# Supplementary material for: Association of Nonsteroidal Anti-inflammatory Drug Use and Adverse Outcomes Among Patients Hospitalized With Influenza
Source: PubMed Central journal article supplement (PMC7330719; doi:10.1001/jamanetworkopen.2020.13880), 2020-07-01
Supplement: jamanetwopen-3-e2013880-s001.pdf [file jamanetwopen-3-e2013880-s001.pdf]

## Supplementary Online Content

Lund LC, Reilev M, Hallas J, et al. Association of nonsteroidal anti-inflammatory drug use and adverse outcomes among patients hospitalized with influenza. *JAMA Netw Open*. 2020;3(7):e2013880. doi:10.1001/jamanetworkopen.2020.13880

**eAppendix 1.** Codes Used to Define Eligibility Criteria, Exposures, Outcomes, and Covariates

**eAppendix 2.** NSAID Sales in Denmark, Used for Calculation of Over-the-Counter NSAID Sales

**eTable 1.** Risk, Risk Differences, and Risk Ratios for Main Cohort, Unmatched Cohorts

**eTable 2.** Univariate Association with Death and Current Use of NSAIDs for Each Covariate Included in the Propensity Score

**eTable 3.** Risks, Risk Differences, and Risk Ratios for Ibuprofen Use, Main Cohort

**eTable 4.** Estimates of Risk Ratios When Investigating Potential Effect Modification by Age, Sex, and History of Cardiovascular Disease

**eTable 5.** Risks, Risk Differences, and Risk Ratios for In-Hospital Death, Main Population

**eTable 6.** Risks, Risk Differences, and Risk Ratios for Main Cohort Using Inverse Probability of Treatment Weights

**eTable 7.** Baseline Characteristics of Those Currently Using NSAIDs and Those Currently Using Acetaminophen

**eTable 8.** Risks, Risk Differences, and Risk Ratios for Cohort Diagnosed With any Bacterial Pneumonia

**eTable 9.** Risks, Risk Differences, and Risk Ratios for Cohort Diagnosed With *Streptococcus pneumoniae* Pneumonia

This supplementary material has been provided by the authors to give readers additional information about their work.

**eAppendix 1.** Codes Used to Define Eligibility Criteria, Exposures, Outcomes, and Covariates

| <i>Eligibility criteria</i>                                  | <i>Coding system</i> | <i>Code</i>                                                    |
|--------------------------------------------------------------|----------------------|----------------------------------------------------------------|
| Pneumonia or hospitalized influenza                          | ICD-10               | B01.2, J09-J18, A48.1, A70                                     |
| Bacterial pneumonia                                          | ICD-10               | J13-J15, J16.0, J17.0, A48.1, A70                              |
| <i>S. pneumoniae</i> pneumonia                               | ICD-10               | J13                                                            |
| <i>Exposures</i>                                             |                      |                                                                |
| NSAID                                                        | ATC                  | M01A (excluding M01AX)                                         |
| Acetaminophen                                                | ATC                  | N02BE01                                                        |
| <i>Prescription drug use</i>                                 |                      |                                                                |
| Antihypertensives                                            | ATC                  | C08, C03CA, C07, C09                                           |
| Antidiabetic drugs                                           | ATC                  | A10                                                            |
| Low-dose aspirin                                             | ATC                  | B01AC06, B01AC30, N02BA01                                      |
| Immunosuppressants                                           | ATC                  | L04                                                            |
| Any antibiotic                                               | ATC                  | J01                                                            |
| Beta-lactamase sensitive penicillins                         | ATC                  | J01CE                                                          |
| Extended-spectrum penicillins                                | ATC                  | J01CA02, J01CA04                                               |
| Macrolides                                                   | ATC                  | J01FA                                                          |
| Amoxicillin and clavulanic acid                              | ATC                  | J01CR                                                          |
| Fluoroquinolones used for upper respiratory tract infections | ATC                  | J01MA14                                                        |
| Other antibiotics                                            | ATC                  | J01 (excluding J01CE, J01CA02, J01CA04, J01FA, J01CR, J01MA14) |
| Opioids                                                      | ATC                  | N02A                                                           |
| Benzodiazepines                                              | ATC                  | N05BA, N05CD                                                   |
| Non-benzodiazepine benzodiazepine receptor agonists          | ATC                  | N05CF                                                          |
| 1st gen. antipsychotics                                      | ATC                  | N05AA, N05AB, N05AC, N05AD, N05AF, N05AG, N05AL01              |

|                                       |        |                                                                                                   |
|---------------------------------------|--------|---------------------------------------------------------------------------------------------------|
| 2nd gen. antipsychotics               | ATC    | N05AE, N05AH, N05AX, N05AL05                                                                      |
| Systemic glucocorticoids              | ATC    | H02AB                                                                                             |
| Inhaled corticosteroids               | ATC    | R03BA01-09, R03AK06-08, R03AK10, R03AK11                                                          |
| <i>History of</i>                     |        |                                                                                                   |
| Asthma                                | ICD-10 | J45, J46                                                                                          |
| Chronic obstructive pulmonary disease | ICD-10 | J41-J44                                                                                           |
| Cardiovascular disease                | ICD-10 | I20-I25, I47-I50                                                                                  |
| Ischaemic stroke                      | ICD-10 | I63, I64                                                                                          |
| Chronic kidney disease                | ICD-10 | N00, N01, N03-N06, N08.8, N14.1, N14.2, N16.8, N17, N25.1, N26, N27                               |
| Liver disease                         | ICD-10 | B18, K70.0- K70.3, K709, K71, K73, K74, K76.0, B15.0, B16.0, B16.2, B19.0, K70.4, K72, K76.6, I85 |
| Alcohol related disorders             | ICD-10 | F10, E24.4, G31.2, G62.1, G72.1, I42.6, K29.2, K70, K85.2, K86.0, Q86.0, Z50.2, Z71.4, Z72.1      |
| Dementia                              | ICD-10 | F01-F04                                                                                           |
| Cancer                                | ICD-10 | C00-C97, excluding C44                                                                            |
| Human immunodeficiency virus          | ICD-10 | B20-B22, B24                                                                                      |
| Obesity                               | ICD-10 | E66                                                                                               |
| Hemiplegia and paraplegia             | ICD-10 | G04.1, G11.4, G80.1, G80.2, G83.0-G83.4, G83.9                                                    |
| <i>Outcomes</i>                       |        |                                                                                                   |
| Admission to intensive care unit      | SKS    | NABB, NABE                                                                                        |
| Pleural empyema or lung abscess       | ICD-10 | J85, J86                                                                                          |

**eAppendix 2.** NSAID Sales in Denmark, Used for Calculation of Over-the-Counter NSAID Sales

Source:<https://medstat.dk>

| Drug (ATC code)                            | DDD sold (x 1000) |        |        |        |        |        |        |        |        | Total   |
|--------------------------------------------|-------------------|--------|--------|--------|--------|--------|--------|--------|--------|---------|
|                                            | 2010              | 2011   | 2012   | 2013   | 2014   | 2015   | 2016   | 2017   | 2018   |         |
| NSAIDs excluding glucosamine, overall sale | 72.412            | 73.722 | 72.556 | 69.025 | 65.614 | 66.389 | 64.812 | 60.784 | 57.663 | 602.977 |
| ibuprofen (M01AE01), overall sale          | 48.110            | 50.899 | 52.577 | 51.474 | 49.844 | 51.594 | 51.550 | 48.999 | 46.856 | 451.903 |
| ibuprofen (M01AE01), over the counter sale | 14.914            | 16.797 | 17.876 | 16.986 | 10.467 | 11.351 | 11.341 | 11.270 | 11.714 | 122.716 |

**eTable 1.** Risk, Risk Differences, and Risk Ratios for Main Cohort, Unmatched Cohorts

| <b>Exposure</b>               | <b>Risk (exposed), %</b> | <b>Risk (unexposed), %</b> | <b>Risk difference, %</b> | <b>Risk ratio</b> |
|-------------------------------|--------------------------|----------------------------|---------------------------|-------------------|
| Intensive care unit admission |                          |                            |                           |                   |
| Current use                   | 20.0 (16.6-23.4)         | 13.3 (12.5-14.0)           | 6.7 (3.2-10.3)            | 1.51 (1.26-1.81)  |
| Incident use                  | 25.0 (13.7-36.3)         | 13.3 (12.5-14.0)           | 11.7 (0.4-23.1)           | 1.89 (1.19-2.98)  |
| Chronic use                   | 28.2 (20.8-35.6)         | 13.3 (12.5-14.0)           | 14.9 (7.5-22.4)           | 2.13 (1.62-2.78)  |
| 30-day mortality              |                          |                            |                           |                   |
| Current use                   | 7.1 (4.9-9.3)            | 7.8 (7.2-8.4)              | -0.7 (-3.0-1.6)           | 0.91 (0.66-1.26)  |
| Incident use                  | 7.1 (0.4-13.9)           | 7.8 (7.2-8.4)              | -0.6 (-7.4-6.1)           | 0.92 (0.36-2.37)  |
| Chronic use                   | 7.0 (2.8-11.3)           | 7.8 (7.2-8.4)              | -0.7 (-5.0-3.5)           | 0.90 (0.49-1.65)  |

**eTable 2.** Univariate Association with Death and Current Use of NSAIDs for Each Covariate Included in the Propensity Score

| <b>Covariate</b>                                     | <b>RR(exposure)</b> | <b>RR(outcome)</b> |
|------------------------------------------------------|---------------------|--------------------|
| <i>Prescription drug use</i>                         |                     |                    |
| Antihypertensives                                    | 1.19 (0.96-1.46)    | 1.11 (0.89-1.38)   |
| Antidiabetic drugs                                   | 1.11 (0.88-1.39)    | 0.86 (0.69-1.07)   |
| Low-dose aspirin                                     | 0.90 (0.71-1.13)    | 1.04 (0.86-1.26)   |
| Immunosuppressants                                   | 1.23 (0.71-2.15)    | 0.91 (0.50-1.65)   |
| Recent antibiotics                                   | 1.43 (1.18-1.74)    | 1.54 (1.28-1.85)   |
| Beta-lactams (monotherapy)                           | 1.14 (0.89-1.47)    | 1.51 (1.21-1.88)   |
| Beta-lactams combined with beta-lactamase inhibitors | 1.64 (1.17-2.30)    | 1.59 (1.15-2.19)   |
| Macrolides                                           | 1.48 (1.04-2.09)    | 1.04 (0.69-1.55)   |
| Quinolones                                           | 0.88 (0.35-2.20)    | 1.56 (0.77-3.17)   |
| Opioids                                              | 2.29 (1.90-2.75)    | 1.45 (1.21-1.73)   |
| Benzodiazepines                                      | 1.57 (1.22-2.03)    | 1.79 (1.41-2.28)   |
| Non-benzodiazepine benzodiazepine receptor agonists  | 1.25 (0.97-1.61)    | 1.27 (1.01-1.60)   |
| 1st gen. antipsychotics                              | 1.92 (1.26-2.92)    | 2.82 (1.89-4.19)   |
| 2nd generation antipsychotics                        | 1.23 (0.83-1.83)    | 2.09 (1.47-2.97)   |
| Systemic glucocorticoids                             | 1.59 (1.26-2.00)    | 1.44 (1.15-1.80)   |
| Inhaled corticosteroids                              | 1.32 (1.06-1.64)    | 0.95 (0.76-1.20)   |
| <i>Prior diagnoses</i>                               |                     |                    |
| Asthma                                               | 1.05 (0.80-1.39)    | 0.74 (0.53-1.03)   |
| COPD                                                 | 1.07 (0.86-1.33)    | 1.44 (1.20-1.74)   |
| Cardiovascular disease                               | 0.74 (0.60-0.91)    | 1.23 (1.03-1.46)   |
| Stroke                                               | 1.09 (0.80-1.47)    | 1.53 (1.22-1.91)   |
| Chronic kidney disease                               | 0.72 (0.43-1.18)    | 1.20 (0.78-1.83)   |
| Liver disease                                        | 1.01 (0.63-1.62)    | 2.29 (1.53-3.41)   |
| Alcohol related disorders                            | 1.02 (0.73-1.43)    | 2.98 (2.27-3.90)   |
| Dementia                                             | 0.62 (0.30-1.27)    | 2.05 (1.46-2.86)   |
| Cancer                                               | 1.05 (0.84-1.30)    | 1.11 (0.92-1.35)   |
| HIV                                                  | -                   | -                  |
| Obesity                                              | 1.02 (0.75-1.40)    | 1.01 (0.73-1.41)   |
| Hemiplegia and paraplegia                            | 0.86 (0.38-1.99)    | 1.15 (0.55-2.40)   |

**eTable 3.** Risks, Risk Differences, and Risk Ratios for Ibuprofen Use, Main Cohort

| <b>Exposure</b>                      | <b>Risk (exposed), %</b> | <b>Risk (unexposed), %</b> | <b>Risk difference, %</b> | <b>Risk ratio</b> |
|--------------------------------------|--------------------------|----------------------------|---------------------------|-------------------|
| <i>Intensive care unit admission</i> |                          |                            |                           |                   |
| Current use                          | 20.0 (16.6-23.4)         | 16.0 (12.8-19.1)           | 4.0 (-0.6-8.7)            | 1.25 (0.96-1.63)  |
| Incident use                         | 25.0 (13.7-36.3)         | 17.9 (7.8-27.9)            | 7.1 (-8.0-22.3)           | 1.40 (0.68-2.88)  |
| Chronic use                          | 28.2 (20.8-35.6)         | 14.8 (9.0-20.6)            | 13.4 (4.0-22.8)           | 1.90 (1.19-3.06)  |
| <i>30-day mortality</i>              |                          |                            |                           |                   |
| Current use                          | 7.1 (4.9-9.3)            | 6.9 (4.7-9.1)              | 0.2 (-2.9-3.3)            | 1.03 (0.66-1.60)  |
| Incident use                         | 7.1 (0.4-13.9)           | 7.1 (0.4-13.9)             | 0.0 (-9.5-9.5)            | 1.00 (0.26-3.80)  |
| Chronic use                          | 7.0 (2.8-11.3)           | 4.9 (1.4-8.5)              | 2.1 (-3.4-7.6)            | 1.43 (0.56-3.65)  |

**eTable 4.** Estimates of Risk Ratios When Investigating Potential Effect Modification by Age, Sex, and History of Cardiovascular Disease

| <b>Effect modifier</b> |        | <b>ICU admission</b> | <b>p-value</b> | <b>30-day mortality</b> | <b>p-value</b> | <b>In-hospital death</b> | <b>p-value</b> |
|------------------------|--------|----------------------|----------------|-------------------------|----------------|--------------------------|----------------|
| Age                    | 65+    | 1.04 (0.68-1.58)     |                | 0.98 (0.56-1.71)        |                | 0.99 (0.53-1.84)         |                |
|                        | <65    | 1.46 (1.05-2.04)     | 0.21           | 1.07 (0.52-2.21)        | 0.84           | 1.16 (0.56-2.41)         | 0.75           |
| Sex                    | Male   | 0.89 (0.60-1.31)     |                | 0.86 (0.46-1.64)        |                | 0.96 (0.49-1.90)         |                |
|                        | Female | 1.67 (1.16-2.41)     | 0.02           | 1.21 (0.65-2.24)        | 0.46           | 1.18 (0.60-2.29)         | 0.68           |
| Cardiovascular disease | Yes    | 0.84 (0.51-1.39)     |                | 0.61 (0.28-1.30)        |                | 0.50 (0.19-1.31)         |                |
|                        | No     | 1.45 (1.07-1.98)     | 0.07           | 1.33 (0.77-2.31)        | 0.10           | 1.40 (0.80-2.45)         | 0.06           |



**eTable 5.** Risks, Risk Differences, and Risk Ratios for In-Hospital Death, Main Population

| <b>Exposure</b> | <b>Risk (exposed), %</b> | <b>Risk (unexposed), %</b> | <b>Risk difference, %</b> | <b>Risk ratio</b> |
|-----------------|--------------------------|----------------------------|---------------------------|-------------------|
| Current use     | 6.3 (4.3-8.4)            | 6.0 (3.9-8.0)              | 0.4 (-2.5-3.3)            | 1.06 (0.66-1.71)  |
| Incident use    | 7.1 (0.4-13.9)           | 7.1 (0.4-13.9)             | 0.0 (-9.5-9.5)            | 1.00 (0.26-3.80)  |
| Chronic use     | 7.0 (2.8-11.3)           | 4.2 (0.9-7.5)              | 2.8 (-2.5-8.2)            | 1.67 (0.62-4.46)  |

**eTable 6.** Risks, Risk Differences, and Risk Ratios for Main Cohort Using Inverse Probability of Treatment Weights

| <b>Exposure</b>               | <b>Risk (exposed), %</b> | <b>Risk (unexposed), %</b> | <b>Risk difference, %</b> | <b>Risk ratio</b> |
|-------------------------------|--------------------------|----------------------------|---------------------------|-------------------|
| Intensive care unit admission |                          |                            |                           |                   |
| Current use                   | 15.1 (11.7-18.4)         | 13.4 (12.6-14.2)           | 1.7 (-1.7-5.1)            | 1.15 (0.88-1.51)  |
| Incident use                  | 17.5 (5.5-29.6)          | 13.5 (12.7-14.3)           | 4.1 (-7.9-16.0)           | 1.36 (0.60-3.13)  |
| Chronic use                   | 17.5 (8.4-26.5)          | 13.6 (12.7-14.4)           | 3.9 (-5.1-13.0)           | 1.35 (0.72-2.53)  |
| 30-day mortality              |                          |                            |                           |                   |
| Current use                   | 7.4 (4.3-10.5)           | 7.8 (7.1-8.4)              | -0.4 (-3.5-2.8)           | 0.95 (0.60-1.50)  |
| Incident use                  | 5.6 (-1.2-12.4)          | 7.4 (6.8-8.0)              | -1.8 (-8.6-4.9)           | 0.74 (0.20-2.67)  |
| Chronic use                   | 12.8 (0.5-25.2)          | 7.4 (6.8-8.0)              | 5.4 (-6.9-17.7)           | 1.84 (0.61-5.54)  |

**eTable 7.** Baseline Characteristics of Those Currently Using NSAIDs and Those Currently Using Acetaminophen

|                                                      | Unmatched              |                                     |      | Matched                   |                                |      |
|------------------------------------------------------|------------------------|-------------------------------------|------|---------------------------|--------------------------------|------|
|                                                      | NSAID users<br>(n=520) | Acetaminophen<br>users<br>(n=1,786) | SMD  | NSAID<br>users<br>(n=484) | Acetaminophen<br>users (n=484) | SMD  |
| Age, median (IQR)                                    | 66 (54-74)             | 76 (67-83)                          | 0.74 | 68 (56-75)                | 65 (55-76)                     | 0.02 |
| Sex (male)                                           | 232 (44.6)             | 738 (41.3)                          | 0.07 | 212 (43.8)                | 218 (45.0)                     | 0.02 |
| <i>Current drug use</i>                              |                        |                                     |      |                           |                                |      |
| Antihypertensives                                    | 363 (69.8)             | 1,508 (84.4)                        | 0.35 | 351 (72.5)                | 344 (71.1)                     | 0.03 |
| Antidiabetic drugs                                   | 102 (19.6)             | 435 (24.4)                          | 0.11 | 97 (20.0)                 | 98 (20.2)                      | 0.01 |
| Low-dose aspirin                                     | 101 (19.4)             | 522 (29.2)                          | 0.23 | 100 (20.7)                | 104 (21.5)                     | 0.02 |
| Immunosuppressants                                   | 14 (2.7)               | 55 (3.1)                            | 0.02 | 14 (2.9)                  | 18 (3.7)                       | 0.05 |
| Recent antibiotics                                   | 159 (30.6)             | 533 (29.8)                          | 0.02 | 151 (31.2)                | 153 (31.6)                     | 0.01 |
| Beta-lactams (monotherapy)                           | 78 (15.0)              | 286 (16.0)                          | 0.03 | 75 (15.5)                 | 71 (14.7)                      | 0.02 |
| Beta-lactams combined with beta-lactamase inhibitors | 41 (7.9)               | 122 (6.8)                           | 0.04 | 40 (8.3)                  | 41 (8.5)                       | 0.01 |
| Macrolides                                           | 39 (7.5)               | 105 (5.9)                           | 0.06 | 36 (7.4)                  | 37 (7.6)                       | 0.01 |
| Quinolones                                           | 5 (1.0)                | 26 (1.5)                            | 0.05 | NA                        | NA                             | NA   |
| Opioids                                              | 232 (44.6)             | 926 (51.8)                          | 0.15 | 220 (45.5)                | 218 (45.0)                     | 0.01 |
| Non-benzodiazepine benzodiazepine receptor agonists  | 80 (15.4)              | 292 (16.3)                          | 0.03 | 77 (15.9)                 | 73 (15.1)                      | 0.02 |
| Benzodiazepines                                      | 79 (15.2)              | 342 (19.1)                          | 0.11 | 77 (15.9)                 | 73 (15.1)                      | 0.02 |
| 1st gen. antipsychotics                              | 27 (5.2)               | 49 (2.7)                            | 0.13 | 23 (4.8)                  | 19 (3.9)                       | 0.04 |
| 2nd gen. antipsychotics                              | 29 (5.6)               | 77 (4.3)                            | 0.06 | 26 (5.4)                  | 20 (4.1)                       | 0.06 |
| Systemic glucocorticoids                             | 98 (18.8)              | 347 (19.4)                          | 0.01 | 92 (19.0)                 | 98 (20.2)                      | 0.03 |
| Inhaled corticosteroids                              | 115 (22.1)             | 398 (22.3)                          | 0.00 | 109 (22.5)                | 108 (22.3)                     | 0.00 |

*History of:*

|                           |            |            |      |            |            |      |
|---------------------------|------------|------------|------|------------|------------|------|
| Asthma                    | 64 (12.3)  | 234 (13.1) | 0.02 | 62 (12.8)  | 56 (11.6)  | 0.04 |
| COPD                      | 113 (21.7) | 556 (31.1) | 0.21 | 111 (22.9) | 111 (22.9) | 0.00 |
| Cardiovascular disease    | 146 (28.1) | 923 (51.7) | 0.50 | 143 (29.5) | 145 (30.0) | 0.01 |
| Ischaemic stroke          | 51 (9.8)   | 279 (15.6) | 0.18 | 51 (10.5)  | 56 (11.6)  | 0.03 |
| Chronic kidney failure    | 17 (3.3)   | 93 (5.2)   | 0.10 | 16 (3.3)   | 18 (3.7)   | 0.02 |
| Liver disease             | 20 (3.8)   | 59 (3.3)   | 0.03 | 19 (3.9)   | 16 (3.3)   | 0.03 |
| Alcohol related disorders | 40 (7.7)   | 149 (8.3)  | 0.02 | 39 (8.1)   | 30 (6.2)   | 0.07 |
| Dementia                  | 8 (1.5)    | 84 (4.7)   | 0.18 | 8 (1.7)    | (n<5)      | NA   |
| Cancer                    | 117 (22.5) | 455 (25.5) | 0.07 | 113 (23.3) | 116 (24.0) | 0.01 |
| HIV                       | NA         | NA         | NA   | NA         | NA         | NA   |
| Obesity                   | 47 (9.0)   | 193 (10.8) | 0.06 | 47 (9.7)   | 49 (10.1)  | 0.01 |
| Hemiplegia and paraplegia | 6 (1.2)    | 44 (2.5)   | 0.10 | 6 (1.2)    | 8 (1.7)    | 0.03 |

**eTable 8.** Risks, Risk Differences, and Risk Ratios for Cohort Diagnosed With any Bacterial Pneumonia

| <b>Exposure</b>                      | <b>Risk (exposed), %</b> | <b>Risk (unexposed), %</b> | <b>Risk difference, %</b> | <b>Risk ratio</b> |
|--------------------------------------|--------------------------|----------------------------|---------------------------|-------------------|
| <i>Intensive care unit admission</i> |                          |                            |                           |                   |
| Current use                          | 14.3 (13.5-15.0)         | 12.5 (11.7-13.2)           | 1.8 (0.8-2.9)             | 1.15 (1.06-1.24)  |
| Incident use                         | 16.5 (14.3-18.6)         | 11.5 (9.7-13.4)            | 4.9 (2.1-7.8)             | 1.43 (1.16-1.76)  |
| Chronic use                          | 16.5 (15.0-18.1)         | 13.3 (11.9-14.7)           | 3.2 (1.1-5.3)             | 1.24 (1.08-1.43)  |
| <i>Pleuropulmonary complications</i> |                          |                            |                           |                   |
| Current use                          | 2.1 (1.8-2.4)            | 1.0 (0.8-1.2)              | 1.1 (0.7-1.5)             | 2.13 (1.63-2.77)  |
| Incident use                         | 3.9 (2.8-5.0)            | 1.1 (0.5-1.7)              | 2.8 (1.5-4.1)             | 3.67 (1.95-6.91)  |
| Chronic use                          | 2.0 (1.4-2.6)            | 1.1 (0.6-1.5)              | 0.9 (0.2-1.6)             | 1.87 (1.13-3.09)  |
| <i>30-day mortality</i>              |                          |                            |                           |                   |
| Current use                          | 13.9 (13.2-14.7)         | 14.3 (13.6-15.1)           | -0.4 (-1.5-0.7)           | 0.97 (0.90-1.05)  |
| Incident use                         | 14.8 (12.7-16.9)         | 11.4 (9.6-13.3)            | 3.3 (0.6-6.1)             | 1.29 (1.04-1.60)  |
| Chronic use                          | 12.7 (11.3-14.1)         | 12.8 (11.4-14.2)           | -0.0 (-2.0-1.9)           | 1.00 (0.85-1.16)  |

**eTable 9.** Risks, Risk Differences, and Risk Ratios for Cohort Diagnosed With *Streptococcus pneumoniae* Pneumonia

| <b>Exposure</b>                      | <b>Risk (exposed), %</b> | <b>Risk (unexposed), %</b> | <b>Risk difference, %</b> | <b>Risk ratio</b> |
|--------------------------------------|--------------------------|----------------------------|---------------------------|-------------------|
| <i>Intensive care unit admission</i> |                          |                            |                           |                   |
| Current use                          | 25.4 (21.4-29.4)         | 20.6 (16.9-24.3)           | 4.8 (-0.6-10.3)           | 1.23 (0.97-1.57)  |
| Incident use                         | 27.6 (17.6-37.7)         | 14.5 (6.6-22.4)            | 13.2 (0.4-26.0)           | 1.91 (0.99-3.68)  |
| Chronic use                          | 26.4 (19.6-33.3)         | 15.7 (10.1-21.4)           | 10.7 (1.8-19.6)           | 1.68 (1.08-2.62)  |
| <i>Pleuropulmonary complications</i> |                          |                            |                           |                   |
| Current use                          | 6.6 (4.3-8.9)            | 2.4 (1.0-3.8)              | 4.2 (1.5-6.8)             | 2.73 (1.38-5.38)  |
| Incident use                         | 9.2 (2.7-15.7)           | 3.9 (-0.4-8.3)             | 5.3 (-2.6-13.1)           | 2.33 (0.63-8.69)  |
| Chronic use                          | 8.2 (3.9-12.4)           | 1.9 (-0.2-4.0)             | 6.3 (1.5-11.0)            | 4.33 (1.26-14.91) |
| <i>30-day mortality</i>              |                          |                            |                           |                   |
| Current use                          | 9.0 (6.4-11.6)           | 7.0 (4.7-9.4)              | 2.0 (-1.5-5.5)            | 1.28 (0.82-2.00)  |
| Incident use                         | 6.6 (1.0-12.2)           | 9.2 (2.7-15.7)             | -2.6 (-11.2-5.9)          | 0.71 (0.24-2.15)  |
| Chronic use                          | 11.3 (6.4-16.2)          | 6.9 (3.0-10.9)             | 4.4 (-1.9-10.7)           | 1.64 (0.80-3.35)  |
